# Supplementary material for: Circadian Clock Genes Contribute to the Regulation of Hair Follicle Cycling
Source: PubMed Central journal article supplement (PMC2705795; doi:10.1371/journal.pgen.1000573), 2009-07-24

**Figure S3**

**A**

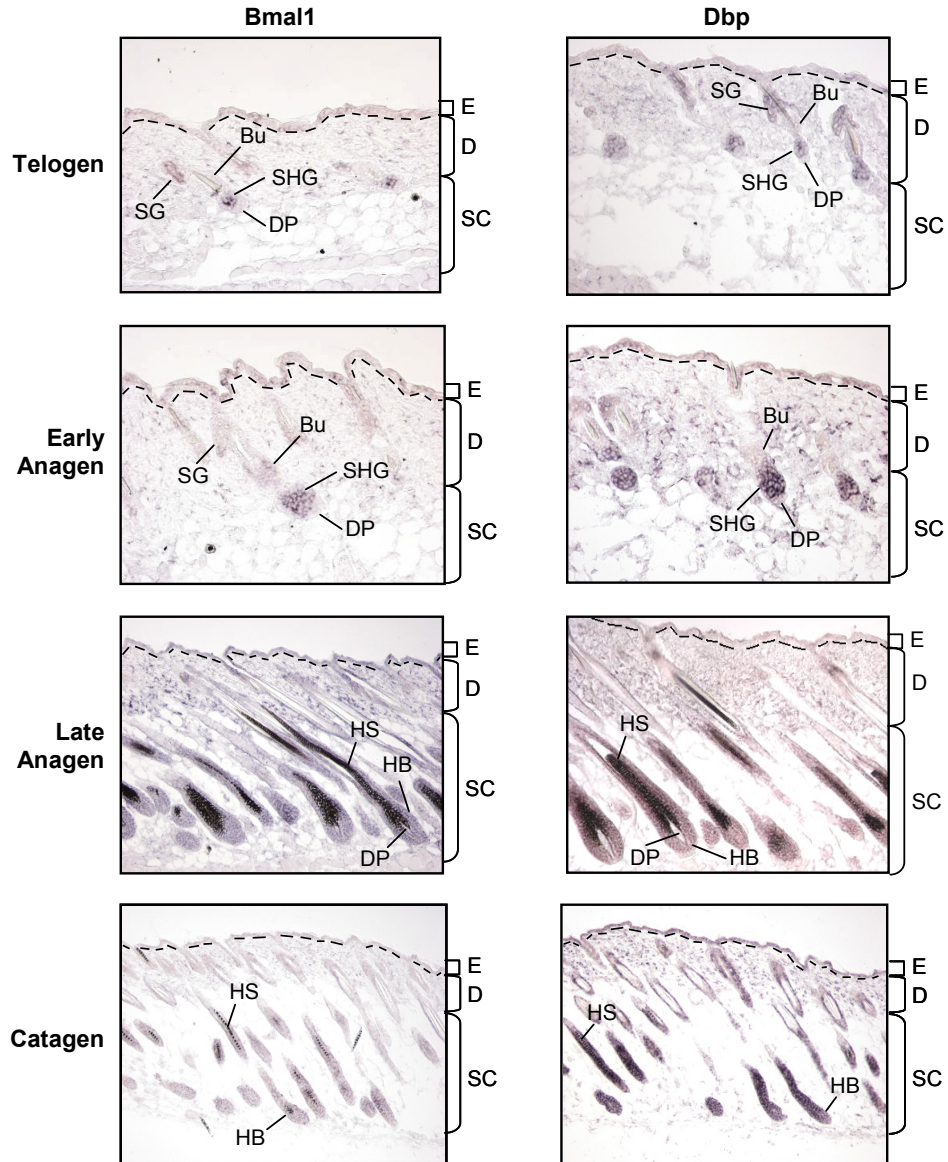

**B**

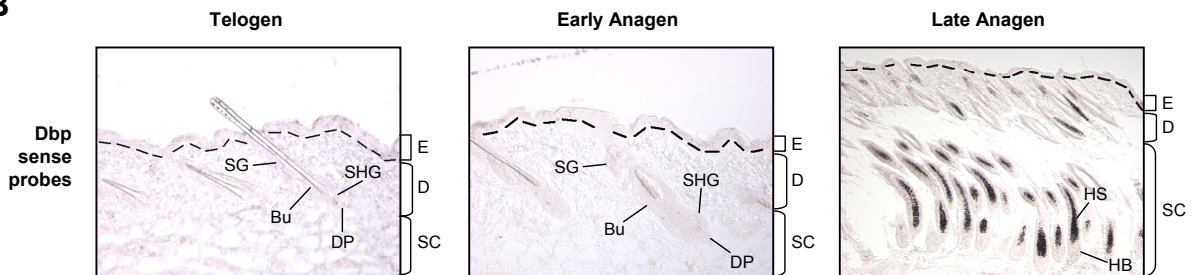

**C**

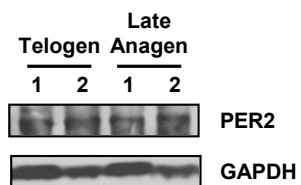

Supplement: pgen.1000573.s003.pdf [file pgen.1000573.s003.pdf]
