# Supplementary material for: Circadian Clock Genes Contribute to the Regulation of Hair Follicle Cycling
Source: PubMed Central journal article supplement (PMC2705795; doi:10.1371/journal.pgen.1000573), 2009-07-24
Supplement: pgen.1000573.s007.pdf [file pgen.1000573.s007.pdf]

Table S2

| Probe Set    | Old Probe Set | pHC  | Gene Symbol   | Gene Name                                          | References                                           |
|--------------|---------------|------|---------------|----------------------------------------------------|------------------------------------------------------|
| 1458467_at   |               | 1    | 1110032D16Rik | RIKEN cDNA 1110032D16 gene                         | Ishimatsu-Tsuji Y, Moro O et al., JID 2005           |
| 1451382_at   |               | 1    | 1810008K03Rik | RIKEN cDNA 1810008K03 gene                         | Ishimatsu-Tsuji Y, Moro O et al., JID 2005           |
| 1430296_at   |               | 1    | 4733401H21Rik | RIKEN cDNA 4733401H21 gene                         | Ishimatsu-Tsuji Y, Moro O et al., JID 2005           |
| 1420415_at   |               | 1    | AY026312      | cDNA sequence AY026312                             | Ishimatsu-Tsuji Y, Moro O et al., JID 2005           |
| 1449970_at   |               | 1    | Capn12        | calpain 12                                         | Dear TN, Meier NT et al. Genomics 2000               |
| 1421001_a_at | 160647_at     | 1    | Car6          | carbonic anhydrase 6                               | Lin KK, Chudova D et al., PNAS 2004; Ishimatsu-Tsuji |
| 1448261_at   | 98140_at      | 0    | Cdh1          | cadherin 1                                         | Muller-Rover S, Tokura Y et al. Exp Dermatol 1999    |
| 1443509_at   |               | 0.53 | Cdh1          | Cadherin 1                                         | ---                                                  |
| 1426673_at   | 100409_at     | 1    | Cdh3          | cadherin 3                                         | Muller-Rover S, Tokura Y et al. Exp Dermatol 1999    |
| 1441255_at   |               | 0.03 | Cdh3          | Cadherin 3                                         | ---                                                  |
| 1424638_at   | 94881_at      | 1    | Cdkn1a        | cyclin-dependent kinase inhibitor 1A (P21)         | Mitsui S, Ohuchi A et al. J Derm Sci 2001            |
| 1421679_a_at | 98067_at      | 1    | Cdkn1a        | cyclin-dependent kinase inhibitor 1A (P21)         | ---                                                  |
| 1418626_a_at | 95286_at      | 1    | Clu           | clusterin                                          | Seiberg M, Marthinuss J. Dev Dyn 1995                |
| 1437458_x_at |               | 1    | Clu           | clusterin                                          | ---                                                  |
| 1437689_x_at |               | 1    | Clu           | clusterin                                          | ---                                                  |
| 1454849_x_at |               | 1    | Clu           | clusterin                                          | ---                                                  |
| 1416325_at   | 93122_at      | 1    | Crisp1        | cysteine-rich secretory protein 1                  | Lin KK, Chudova D et al., PNAS 2004                  |
| 1416776_at   | 160937_at     | 1    | Crym          | crystallin, mu                                     | Aoki N, Ito K et al. JID 2000                        |
| 1416563_at   | 103341_at     | 1    | Ctsp          | cytidine 5'-triphosphate synthase                  | Ishimatsu-Tsuji Y, Moro O et al., JID 2005           |
| 1418989_at   | 104696_at     | 1    | Ctse          | cathepsin E                                        | Ishimatsu-Tsuji Y, Moro O et al., JID 2005           |
| 1427797_s_at |               | 1    | Ctse          | cathepsin E                                        | ---                                                  |
| 1423805_at   | 104633_at     | 1    | Dab2          | disabled homolog 2 (Drosophila)                    | Lin KK, Chudova D et al., PNAS 2004                  |
| 1420498_a_at | 98045_s_at    | 1    | Dab2          | disabled homolog 2 (Drosophila)                    | ---                                                  |
| 1429693_at   |               | 0.98 | Dab2          | disabled homolog 2 (Drosophila)                    | ---                                                  |
| 1430604_a_at |               | 0    | Dab2          | disabled homolog 2 (Drosophila)                    | ---                                                  |
| 1415723_at   | 160265_at     | 0    | Eif5          | eukaryotic translation initiation factor 5         | Ishimatsu-Tsuji Y, Moro O et al., JID 2005           |
| 1433631_at   |               | 0.98 | Eif5          | eukaryotic translation initiation factor 5         | ---                                                  |
| 1454663_at   |               | 1    | Eif5          | eukaryotic translation initiation factor 5         | ---                                                  |
| 1454664_a_at |               | 1    | Eif5          | eukaryotic translation initiation factor 5         | ---                                                  |
| 1456256_at   |               | 0.43 | Eif5          | eukaryotic translation initiation factor 5         | ---                                                  |
| 1419555_at   | 103283_at     | 1    | Eif5          | E74-like factor 5                                  | Lin KK, Chudova D et al., PNAS 2004                  |
| 1419556_at   |               | 1    | Eif5          | E74-like factor 5                                  | ---                                                  |
| 1435663_at   |               | 1    | Esr1          | estrogen receptor 1 (alpha)                        | Ohnemus U, Uenalan M et al. Endocrinology 2005       |
| 1457877_at   |               | 0.97 | Esr1          | Estrogen receptor 1 (alpha)                        | ---                                                  |
| 1460591_at   |               | 1    | Esr1          | estrogen receptor 1 (alpha)                        | ---                                                  |
| 1422540_at   | 94307_at      | 1    | Fbln1         | fibulin 1                                          | Lin KK, Chudova D et al., PNAS 2004                  |
| 1451119_a_at | 94308_at      | 0.91 | Fbln1         | fibulin 1                                          | ---                                                  |
| 1451119_a_at | 94309_g_at    | 1    | Fbln1         | fibulin 1                                          | ---                                                  |
| 1439688_at   |               | 0    | Fbln1         | fibulin 1                                          | ---                                                  |
| 1423136_at   |               | 1    | Fgf1          | fibroblast growth factor 1                         | Kawano M, Komi-Kuramochi A et al. JID 2005           |
| 1450869_at   |               | 0.05 | Fgf1          | fibroblast growth factor 1                         | ---                                                  |
| 1418498_at   | 99893_at      | 0.63 | Fgf13         | fibroblast growth factor 13                        | Kawano M, Komi-Kuramochi A et al. JID 2005           |
| 1418497_at   |               | 1    | Fgf13         | fibroblast growth factor 13                        | ---                                                  |
| 1449545_at   |               | 1    | Fgf18         | fibroblast growth factor 18                        | Kawano M, Komi-Kuramochi A et al. JID 2005           |
| 1449826_a_at |               | 0    | Fgf2          | fibroblast growth factor 2                         | Kawano M, Komi-Kuramochi A et al. JID 2005           |
| 1460296_a_at |               | 1    | Fgf22         | fibroblast growth factor 22                        | Kawano M, Komi-Kuramochi A et al. JID 2005           |
| 1426186_a_at |               | 1    | Fgf5          | fibroblast growth factor 5                         | Kawano M, Komi-Kuramochi A et al. JID 2005           |
| 1438883_at   |               | 1    | Fgf5          | fibroblast growth factor 5                         | ---                                                  |
| 1422243_at   | 99435_at      | 0.2  | Fgf7          | fibroblast growth factor 7                         | Kawano M, Komi-Kuramochi A et al. JID 2005           |
| 1438405_at   |               | 1    | Fgf7          | fibroblast growth factor 7                         | ---                                                  |
| 1424050_s_at | 97509_f_at    | 1    | Fgfr1         | fibroblast growth factor receptor 1                | Kawano M, Komi-Kuramochi A et al. JID 2005           |
| 1425911_a_at |               | 1    | Fgfr1         | fibroblast growth factor receptor 1                | ---                                                  |
| 1436551_at   |               | 1    | Fgfr1         | fibroblast growth factor receptor 1                | ---                                                  |
| 1433489_s_at | 93090_at      | 0.71 | Fgfr2         | fibroblast growth factor receptor 2                | Kawano M, Komi-Kuramochi A et al. JID 2005           |
| 1420847_a_at | 93091_s_at    | 0.08 | Fgfr2         | fibroblast growth factor receptor 2                | ---                                                  |
| 1421841_at   |               | 1    | Fgfr3         | fibroblast growth factor receptor 3                | Kawano M, Komi-Kuramochi A et al. JID 2005           |
| 1425796_a_at |               | 1    | Fgfr3         | fibroblast growth factor receptor 3                | ---                                                  |
| 1450508_at   | 92674_at      | 1    | Foxn1         | forkhead box N1                                    | Meier N, Dear TN et al. Mech Dev 1999                |
| 1456815_at   |               | 1    | Foxn1         | Forkhead box N1                                    | ---                                                  |
| 1450440_at   | 93872_at      | 0    | Gfra1         | glial cell line derived neurotrophic factor family | Botchkareva NV, Botchkarev VA et al. Am J Path 200   |
| 1439015_at   |               | 0.02 | Gfra1         | glial cell line derived neurotrophic factor family | ---                                                  |
| 1423007_a_at | 92449_at      | 0.01 | Gfra2         | glial cell line derived neurotrophic factor family | Botchkareva NV, Botchkarev VA et al. Am J Path 200   |
| 1438650_x_at | 100064_f_at   | 1    | Gja1          | gap junction membrane channel protein alpha        | Risek B, Klier FG et al. Development 1992            |
| 1415800_at   | 100065_r_at   | 1    | Gja1          | gap junction membrane channel protein alpha        | ---                                                  |
| 1415801_at   |               | 1    | Gja1          | gap junction membrane channel protein alpha        | ---                                                  |
| 1437992_x_at |               | 1    | Gja1          | gap junction membrane channel protein alpha        | ---                                                  |
| 1438945_x_at |               | 1    | Gja1          | gap junction membrane channel protein alpha        | ---                                                  |
| 1438973_x_at |               | 0.03 | Gja1          | gap junction membrane channel protein alpha        | ---                                                  |
| 1423271_at   | 98423_at      | 1    | Gjb2          | gap junction membrane channel protein beta 2       | Risek B, Klier FG et al. Development 1992            |
| 1423858_a_at |               | 1    | Hmgcs2        | 3-hydroxy-3-methylglutaryl-Coenzyme A synth        | Schlake T, Beibel M et al. Gene Exp Patterns 2004    |
| 1431833_a_at |               | 1    | Hmgcs2        | 3-hydroxy-3-methylglutaryl-Coenzyme A synth        | ---                                                  |
| 1424067_at   | 96752_at      | 1    | Icam1         | intercellular adhesion molecule                    | Muller-Rover S, Bulfone-Paus et al. J Histochem and  |
| 1421473_at   | 94755_at      | 0    | Il1a          | interleukin 1 alpha                                | Hoffmann R, Happle R et al. Eur J Derm 1998          |
| 1449399_a_at |               | 0.02 | Il1b          | interleukin 1 beta                                 | Hoffmann R, Happle R et al. Eur J Derm 1998          |
| 1448950_at   | 93914_at      | 0.01 | Il1r1         | interleukin 1 receptor, type I                     | Hoffmann R, Happle R et al. Eur J Derm 1998          |
| 1419532_at   | 102658_at     | 1    | Il1r2         | interleukin 1 receptor, type II                    | Hoffmann R, Happle R et al. Eur J Derm 1998          |
| 1457108_at   |               | 0.04 | Il1r2         | Interleukin 1 receptor, type II                    | ---                                                  |

Table S2 – cont.

| Probe Set    | Old Probe Set | pHC  | Gene Symbol | Gene Name                                      | References                                              |
|--------------|---------------|------|-------------|------------------------------------------------|---------------------------------------------------------|
| 1450678_at   | 102353_at     | 1    | Itgb2       | integrin beta 2                                | Muller-Rover S, Buifone-Paus et al. J Histochem and     |
| 1415899_at   | 102362_i_at   | 1    | Junb        | Jun-B oncogene                                 | Lin KK, Chudova D et al., PNAS 2004                     |
| 1415899_at   | 102363_r_at   | 1    | Junb        | Jun-B oncogene                                 | ---                                                     |
| 1452514_a_at | 99956_at      | 1    | Kit         | kit oncogene                                   | Peters EMJ, Maurer M et al. JID 2003                    |
| 1415900_a_at |               | 1    | Kit         | kit oncogene                                   | ---                                                     |
| 1459588_at   |               | 0    | Kit         | Kit oncogene                                   | ---                                                     |
| 1415855_at   | 99577_at      | 1    | Kitl        | kit ligand                                     | Peters EMJ, Maurer M et al. JID 2003                    |
| 1415854_at   |               | 0.12 | Kitl        | kit ligand                                     | ---                                                     |
| 1426152_a_at |               | 0.94 | Kitl        | kit ligand                                     | ---                                                     |
| 1440621_at   |               | 0.72 | Kitl        | Kit ligand                                     | ---                                                     |
| 1448117_at   |               | 0.73 | Kitl        | kit ligand                                     | ---                                                     |
| 1427179_at   | 97814_at      | 1    | Krt1-3      | keratin complex 1, acidic, gene 3              | Meier N, Dear TN et al. Mech Dev 1999                   |
| 1448457_at   | 101569_at     | 1    | Krt2-6g     | keratin complex 2, basic, gene 6g              | Porter Rm, Corden LD et al. British J Derm 2001         |
| 1452957_at   | 97469_at      | 1    | Krtap3-3    | keratin associated protein 3-3                 | Ishimatsu-Tsuji Y, Moro O et al., JID 2005              |
| 1450539_at   | 93710_at      | 1    | Krtap5-1    | keratin associated protein 5-1                 | Wood L, Mills M et al. JBC 1990                         |
| 1450540_x_at |               | 1    | Krtap5-1    | keratin associated protein 5-1                 | ---                                                     |
| 1422958_at   | 92240_at      | 1    | Krtap5-4    | keratin associated protein 5-4                 | Wood L, Mills M et al. JBC 1990                         |
| 1451859_at   | 101374_at     | 1    | Krtap6-1    | keratin associated protein 6-1                 | Aoki N, Ito K et al. JBC 1997                           |
| 1420751_at   | 101375_at     | 1    | Krtap6-1    | keratin associated protein 6-1                 | ---                                                     |
| 1425872_at   | 101376_at     | 1    | Krtap6-1    | keratin associated protein 6-1                 | ---                                                     |
| 1449919_at   | 92253_at      | 1    | Krtap6-2    | keratin associated protein 6-2                 | Aoki N, Ito K et al. JBC 1997                           |
| 1427842_at   | 100735_at     | 1    | Krtap6-3    | keratin associated protein 6-3                 | Aoki N, Ito K et al. JBC 1997                           |
| 1452575_at   |               | 1    | Krtap6-3    | keratin associated protein 6-3                 | ---                                                     |
| 1427211_at   | 102793_at     | 1    | Krtap8-1    | keratin associated protein 8-1                 | Aoki N, Ito K et al. JBC 1997                           |
| 1421689_at   | 97152_at      | 1    | Krtap8-2    | keratin associated protein 8-2                 | Aoki N, Ito K et al. JBC 1997                           |
| 1419707_at   | 92246_at      | 1    | Krtap14     | keratin associated protein 14                  | Aoki N, Ito K et al. JID 1998; Kuhn F, Lassing C et al. |
| 1419507_at   |               | 1    | Krtap15     | keratin associated protein 15                  | Kuhn F, Lassing C et al. Mech Dev 1999                  |
| 1422069_at   | 101161_at     | 1    | Mc1r        | melanocortin 1 receptor                        | Ermak G & Slominski A. JID 1997                         |
| 1417234_at   | 100016_at     | 0.95 | Mmp11       | matrix metalloproteinase 11                    | Ishimatsu-Tsuji Y, Moro O et al., JID 2005              |
| 1419675_at   |               | 0.75 | Ngfb        | nerve growth factor, beta                      | Peters EM, Hendrix S et al. J Histochem Cytochem 2C     |
| 1417155_at   | 103048_at     | 1    | Nmyc1       | neuroblastoma myc-related oncogene 1           | Lin KK, Chudova D et al., PNAS 2004                     |
| 1425922_a_at |               | 1    | Nmyc1       | neuroblastoma myc-related oncogene 1           | ---                                                     |
| 1434802_s_at |               | 0.99 | Ntf3        | neurotrophin 3                                 | Botchkarev VA, Welker P et al. Am J Path 1998           |
| 1450803_at   |               | 0.09 | Ntf3        | neurotrophin 3                                 | ---                                                     |
| 1440353_at   |               | 0.37 | Ntf5        | neurotrophin 5                                 | Botchkarev VA, Botchkareva NV et al. FASEB J 1999       |
| 1420838_at   |               | 0.02 | Ntrk2       | neurotrophic tyrosine kinase, receptor, type 2 | Botchkarev VA, Botchkareva NV et al. FASEB J 1999       |
| 1435196_at   |               | 0.79 | Ntrk2       | neurotrophic tyrosine kinase, receptor, type 2 | ---                                                     |
| 1422329_a_at |               | 0    | Ntrk3       | neurotrophic tyrosine kinase, receptor, type 3 | Botchkarev VA, Welker P et al. Am J Path 1998           |
| 1425071_s_at |               | 0.03 | Ntrk3       | neurotrophic tyrosine kinase, receptor, type 3 | ---                                                     |
| 1426003_at   |               | 0    | Ntrk3       | neurotrophic tyrosine kinase, receptor, type 3 | ---                                                     |
| 1433825_at   |               | 0.87 | Ntrk3       | RIKEN cDNA E430016F16 gene                     | ---                                                     |
| 1417575_at   |               | 1    | Otub2       | OTU domain, ubiquitin aldehyde binding 2       | Schlake T, Beibel M et al. Gene Exp Patterns 2004       |
| 1417576_a_at |               | 1    | Otub2       | OTU domain, ubiquitin aldehyde binding 2       | ---                                                     |
| 1418883_a_at | 100720_at     | 1    | Pabpc1      | poly A binding protein, cytoplasmic 1          | Ishimatsu-Tsuji Y, Moro O et al., JID 2005              |
| 1453840_at   |               | 0.99 | Pabpc1      | poly A binding protein, cytoplasmic 1          | ---                                                     |
| 1427562_a_at |               | 0.97 | Prkca       | protein kinase C, alpha                        | Li LF, Chang BD et al. J Dermatol 1999                  |
| 1450945_at   |               | 1    | Prkca       | protein kinase C, alpha                        | ---                                                     |
| 1448556_at   | 95030_at      | 1    | Prlr        | prolactin receptor                             | Foitzik K, Krause K et al. Am J Pathology 2003          |
| 1425853_s_at |               | 1    | Prlr        | prolactin receptor                             | ---                                                     |
| 1420467_at   |               | 1    | Psors1c2    | psoriasis susceptibility 1 candidate 2 (human) | Schlake T, Beibel M et al. Gene Exp Patterns 2004       |
| 1422324_a_at | 104262_at     | 1    | Pthlh       | parathyroid hormone-like peptide               | Cho YM, Woodard GL et al. JID 2003                      |
| 1427527_a_at |               | 1    | Pthlh       | parathyroid hormone-like peptide               | ---                                                     |
| 1417092_at   | 98482_at      | 1    | Pthr1       | parathyroid hormone receptor 1                 | Cho YM, Woodard GL et al. JID 2003                      |
| 1421856_at   | 101051_at     | 1    | S100a3      | S100 calcium binding protein A3                | Kizawa K, Tsuchimoto S et al. JID 1998                  |
| 1421856_at   | 101052_g_at   | 1    | S100a3      | S100 calcium binding protein A3                | ---                                                     |
| 1421375_a_at | 92770_at      | 1    | S100a6      | S100 calcium binding protein A6 (calcylin)     | Wood L, Carter D et al. JID 1991                        |
| 1415964_at   | 94056_at      | 1    | Scd1        | stearoyl-Coenzyme A desaturase 1               | Zheng Y, Eilertsen KJ et al. Nat Genet 1999             |
| 1415964_at   | 94057_g_at    | 1    | Scd1        | stearoyl-Coenzyme A desaturase 1               | ---                                                     |
| 1415965_at   |               | 0.94 | Scd1        | stearoyl-Coenzyme A desaturase 1               | ---                                                     |
| 1415822_at   | 95758_at      | 1    | Scd2        | stearoyl-Coenzyme A desaturase 2               | Zheng Y, Eilertsen KJ et al. Nat Genet 1999             |
| 1415823_at   |               | 1    | Scd2        | stearoyl-Coenzyme A desaturase 2               | ---                                                     |
| 1415824_at   |               | 1    | Scd2        | stearoyl-Coenzyme A desaturase 2               | ---                                                     |
| 1423366_at   |               | 0.99 | Scd3        | stearoyl-coenzyme A desaturase 3               | Zheng Y, Prouty SM et al. Genomics 2001                 |
| 1450956_at   |               | 1    | Scd3        | stearoyl-coenzyme A desaturase 3               | ---                                                     |
| 1418460_at   | 103755_at     | 0    | Sh3d19      | SH3 domain protein D19                         | Shimomura Y, Aoki N et al. J Derm Sci 2003              |
| 1418461_at   |               | 0    | Sh3d19      | SH3 domain protein D19                         | ---                                                     |
| 1445781_at   |               | 0.01 | Sh3d19      | SH3 domain protein D19                         | ---                                                     |
| 1449084_s_at |               | 0    | Sh3d19      | SH3 domain protein D19                         | ---                                                     |
| 1449579_at   | 103813_at     | 1    | Sh3yl1      | Sh3 domain YSC-like 1                          | Aoki N, Ito K et al. JID 2000                           |
| 1420653_at   |               | 0.51 | Tgfb1       | transforming growth factor, beta 1             | Welker P, Foitzik K et al. Arch Dermatol Res 1997       |
| 1417455_at   | 102751_at     | 1    | Tgfb3       | transforming growth factor, beta 3             | Welker P, Foitzik K et al. Arch Dermatol Res 1997       |
| 1425444_a_at |               | 0.3  | Tgfb2       | transforming growth factor, beta receptor II   | Paus R, Foitzik K et al. JID 1997                       |
| 1426397_at   |               | 1    | Tgfb2       | transforming growth factor, beta receptor II   | ---                                                     |
| 1443115_at   |               | 0.26 | Tgfb2       | Transforming growth factor, beta receptor II   | ---                                                     |
| 1421811_at   | 160469_at     | 1    | Thbs1       | thrombospondin 1                               | Schlake T, Beibel M et al. Gene Exp Patterns 2004       |
| 1450377_at   |               | 1    | Thbs1       | thrombospondin 1                               | ---                                                     |
| 1460302_at   |               | 1    | Thbs1       | thrombospondin 1                               | ---                                                     |
| 1448821_at   | 102666_at     | 1    | Tyr         | tyrosinase                                     | Ermak G & Slominski A. JID 1997                         |
| 1417717_a_at |               | 1    | Tyr         | tyrosinase                                     | ---                                                     |
| 1450772_at   | 103490_at     | 1    | Wnt11       | wingless-related MMTV integration site 11      | Lin KK, Chudova D et al., PNAS 2004                     |
