# Supplementary material for: Circadian Clock Genes Contribute to the Regulation of Hair Follicle Cycling
Source: PLoS Genet. 2009 Jul 24;5(7):e1000573. doi: 10.1371/journal.pgen.1000573 (PMC2705795; doi:10.1371/journal.pgen.1000573)
Supplement: Table S4 — Hair cycle staging of Clock mutant mice (Cl/Cl) and their control littermates (+/+ and Cl+). Methodology same as Table S3. (0.06 MB PDF) [file pgen.1000573.s009.pdf]

### Table S4

[illegible]
